# Supplementary material for: Chronically implanted Neuropixels probes enable high-yield recordings in freely moving mice
Source: eLife journal article supplement (doi:10.7554/elife.47188), 2019-08-14
Supplement: supp [file elife-47188-supp-v1.zip]

Archive with 6 entries (6 files):
- elife_poa_e47188_Video_1.mov
- elife_poa_e47188_Figure_3_source_data_1.xlsx
- elife_poa_e47188_Figure_4_source_data_1.xlsx
- elife_poa_e47188_Transparent_Reporting_File.pdf
- elife_poa_e47188_Figure_6_source_data_1.xlsx
- elife_poa_e47188_Video_2.mp4
