# Supplementary material for: Chronically implanted Neuropixels probes enable high-yield recordings in freely moving mice
Source: eLife journal article supplement (doi:10.7554/elife.47188), 2019-08-14
Supplement: supp [file elife-47188-supp-v1.zip › elife_poa_e47188_Figure_3_source_data_1.xlsx]

## Sheet: Sheet1
open field	samples (2 per mouse)										median	mean	stdev	pooled stdev	effect size
mean velocity naïve	3.63843	4.79026	3.16126	4.11699	3.17063	4.06296	5.09694	2.1454			3.85069	3.77286	0.955757	1.64381	1.84885
mean velocity implanted	9.6756	9.38217	7.92692	5.40659	3.48998	6.716	5.28693	6.61193			6.66396	6.81201	2.11914
max velocity naïve	20.2135	29.5548	23.644	31.8346	49.7876	23.7434	24.852	20.3836			24.2977	28.0017	9.69141	8.23537	0.483887
max velocity implanted	35.55	39.1035	34.3628	25.5995	19.2672	36.058	33.9581	31.9943			34.1604	31.9867	6.45906
max acceleration implanted	66.9856	189.453	97.4874	240.211	180.185	176.07	137.769	106.542			156.919	149.338	57.2825	43.2466	0.902136
max accereration naïve	87.0336	139.941	108.681	78.5759	101.462	129.287	128.868	108.74			108.71	110.324	21.4302
time moving naïve	22	32	34	35	40	42	51.5	54			37.5	38.8125	10.4879	9.26374	-1.13345
time moving implanted	20	20	24	26	27	31	36	42.5			26.5	28.3125	7.85101
escape
mean velocity implanted	14.4134	8.59906	5.7365	1.25104	8.68513	7.49478	4.87755	6.98238	4.09695	21.5283	7.23858	8.36651	5.77906	9.22906	-0.833616
mean velocity naïve	41.7	5.4	13.24	31.74	16.25	13.12	11.72	5.52	13.87	8.04	13.18	16.06	11.7027
max velocity implanted	61.6119	34.5368	34.3517	5.6338	55.2698	58.4042	24.6121	65.1172	16.5351	73.1836	44.9033	42.9256	22.89	21.6708	-0.00643169
max velocity naïve	72.85	23.66	72.13	71.42	31.36	32.22	29	34.9	36.09	27.02	33.56	43.065	20.3789
max acceleration implanted	223.177	113.793	158.105	34.7956	215.797	194.357	100.82	216.487	93.2895	303.287	176.231	165.391	79.9193	190.379	-0.64288
max acceleration naïve	679.82	158.2	689.18	599.647	117.18	67.48	179.75	115.98	116.4	154.18	156.19	287.782	257.102
