# Supplementary material for: Chronically implanted Neuropixels probes enable high-yield recordings in freely moving mice
Source: eLife journal article supplement (doi:10.7554/elife.47188), 2019-08-14
Supplement: supp [file elife-47188-supp-v1.zip › elife_poa_e47188_Figure_4_source_data_1.xlsx]

## Sheet: Sheet1
Day of recording	1	2	3	4	5	6	7		8+		average	sd
NP6	28			14		16			21		19.75	6.23832
NP7	25			17					18		20	4.3589
NP8	68	89	97	68			79	62			77.1667	13.6736
NP9	103	108	143	124	109						117.4	16.3187
NP13	145
NP14	67	92				68	97		79		80.6	13.6492
NP15	88	70		55	44						64.25	19.0853
NP16	69	55	36	30	28						43.6	17.7567
