# Supplementary material for: Chronically implanted Neuropixels probes enable high-yield recordings in freely moving mice
Source: eLife journal article supplement (doi:10.7554/elife.47188), 2019-08-14
Supplement: supp [file elife-47188-supp-v1.zip › elife_poa_e47188_Figure_6_source_data_1.xlsx]

## Sheet: Sheet1
event rate			SNR
first implant	re-implant		first implant	re-implant
1352.7	447.45		5.8691	5.4003
1100.2	274.4		5.0848	4.52
	200.16			4.4478
	291.462			4.901
	209.057			4.399
1163.8			5.5767
1163.8			5.06
225.14			3.6551
